# Supplementary material
Source: PubMed Central journal article supplement (PMC8206650)
Supplement: ADHM-10-0-s001.pdf [file ADHM-10-0-s001.pdf]

**ADVANCED  
HEALTHCARE  
MATERIALS**

Supporting Information

for *Adv. Healthcare Mater.*, DOI: 10.1002/adhm.202002142

Hemagglutinin Functionalized Liposomal Vaccines Enhance  
Germinal Center and Follicular Helper T Cell Immunity

*Mai N. Vu, Hannah G. Kelly, Hyon-Xhi Tan, Jennifer A. Juno, Robyn Esterbauer, Thomas P. Davis, Nghia P. Truong\*, Adam K. Wheatley\*, Stephen J. Kent\**

## Supporting Information

**Hemagglutinin Functionalized Liposomal Vaccines Enhance Germinal Center and Follicular Helper T Cell Immunity**

Mai N. Vu, Hannah G. Kelly, Hyon-Xhi Tan, Jennifer A. Juno, Robyn Esterbauer, Thomas P. Davis, Nghia P. Truong\*, Adam K. Wheatley\*, Stephen J. Kent\*

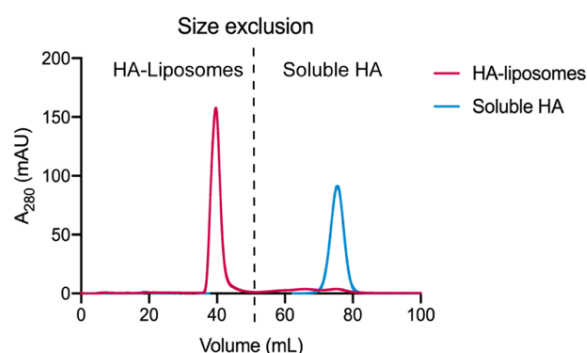

**Figure S1:** Size exclusion fraction showing separation of HA-liposomes from soluble HA proteins and fraction of soluble HA as control.

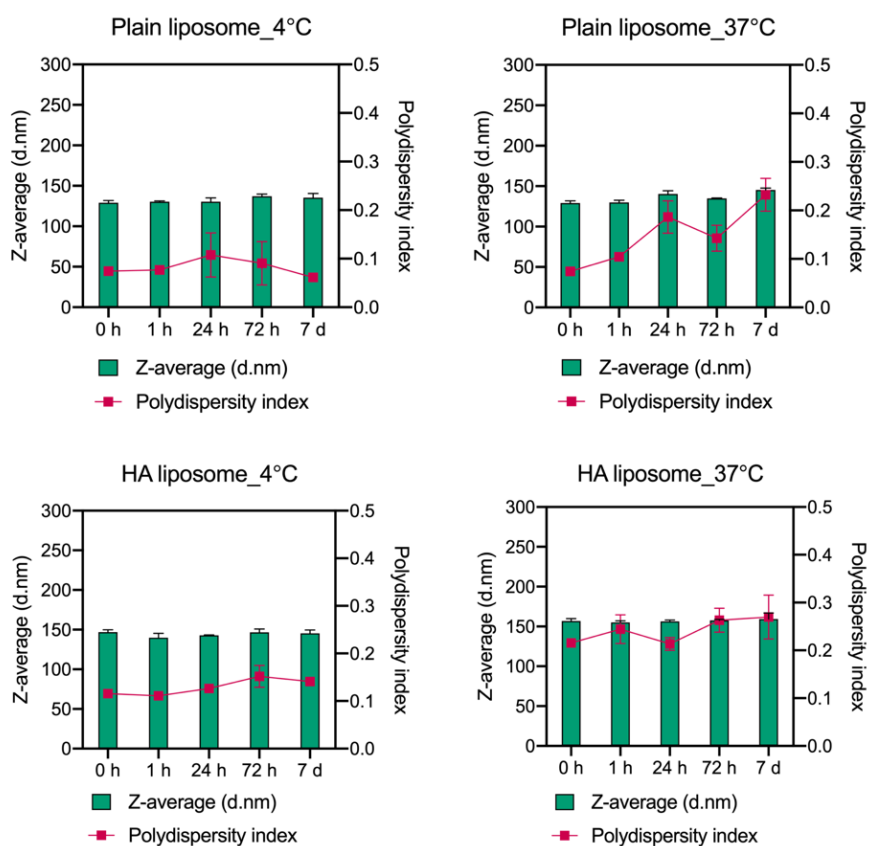

**Figure S2:** Size and polydispersity index of plain and HA-liposomes in PBS at 4 °C (left) and 37 °C (right) after 0h, 1h, 24h, 72h and 7 days. Data are presented as mean ± SD.

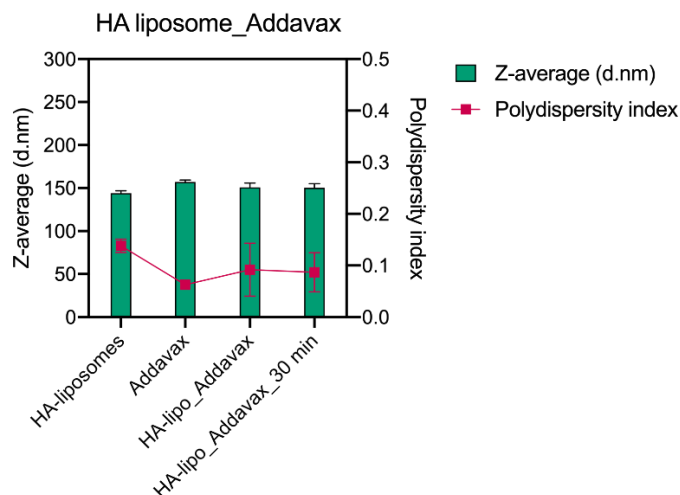

**Figure S3:** Size and polydispersity index of HA-liposomes, Addavax and their mixture at 0 and 30 minutes. Data are presented as mean  $\pm$  SD.

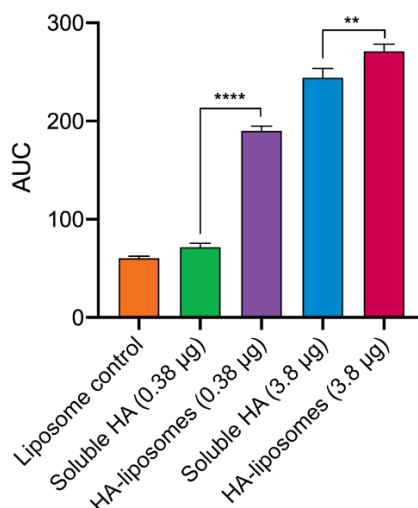

**Figure S4:** Protective immunity induced in mice analyzed by area under the curve (AUC). Five groups of C57BL/6 mice ( $n = 5$ ) were immunized with liposome control, HA-liposomes or soluble HA mixed with Co-free liposomes at a low dose (0.38  $\mu\text{g}$ ) or a high dose (3.8  $\mu\text{g}$ ) of HA proteins. Relative protection of immunized mice from A/PR8/34 virus challenge at a viral dose of 2000 TCID<sub>50</sub> in day 28 post immunization, assessed by AUC analysis. Data are presented as mean  $\pm$  SD and representative of one of two independent experiments.

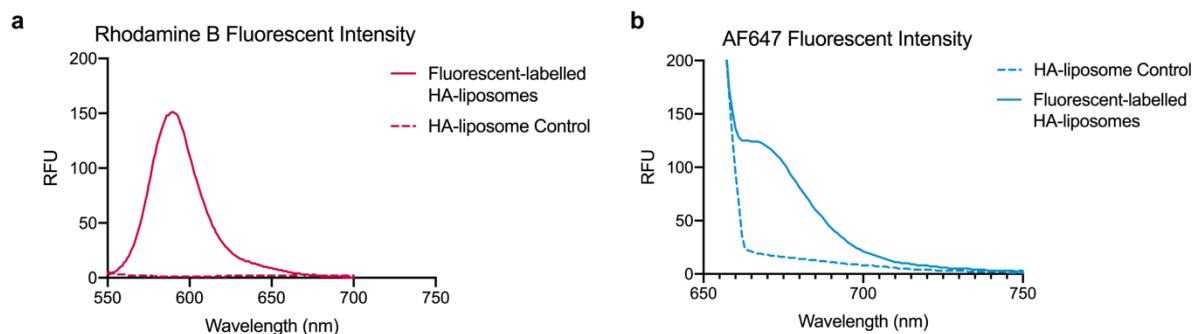

**Figure S5:** Fluorescence measurement of fluorescent-labelled HA-liposomes (solid lines) using a fluorescence spectrophotometer with an excitation of (a) 535 nm for Rhodamine B-contained liposomes and (b) 635 nm for AF647-labelled HA. Unlabelled HA-liposomes (dashed lines) were used as control.

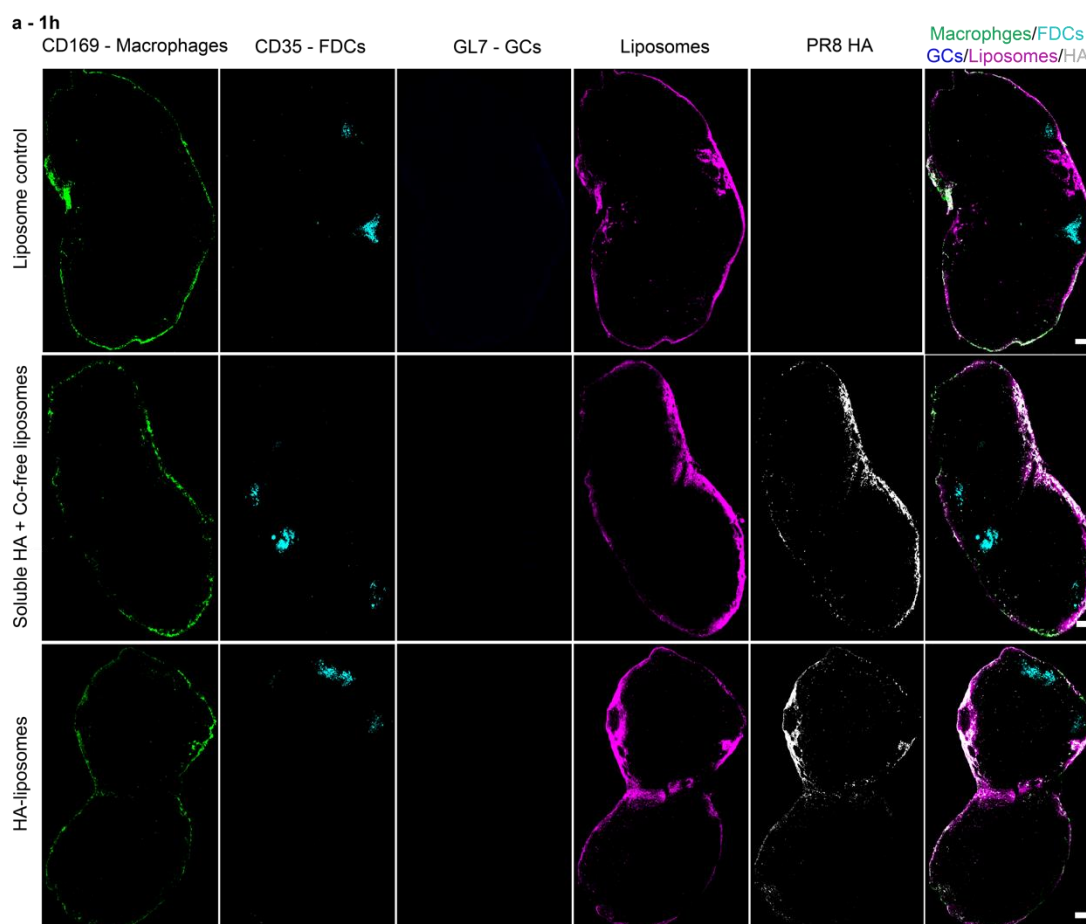

**b- 24h**

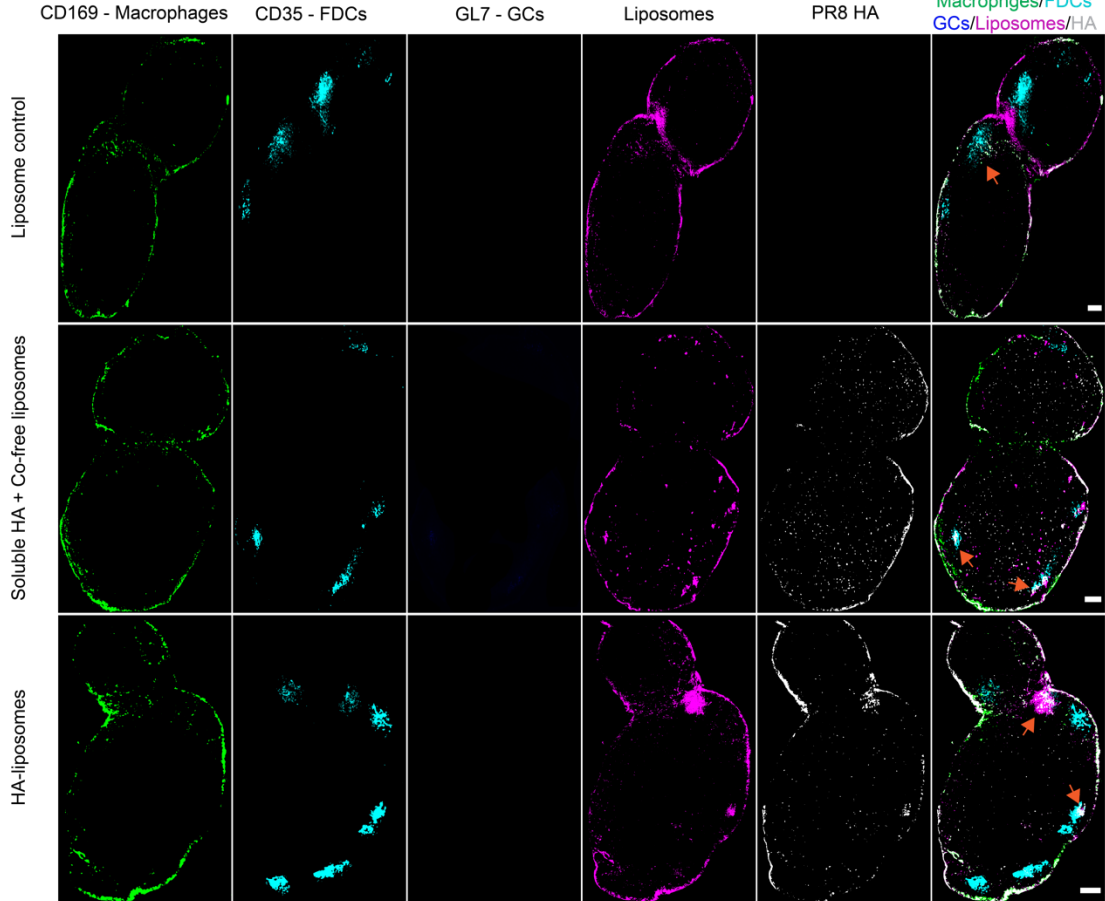

**c - 72h**

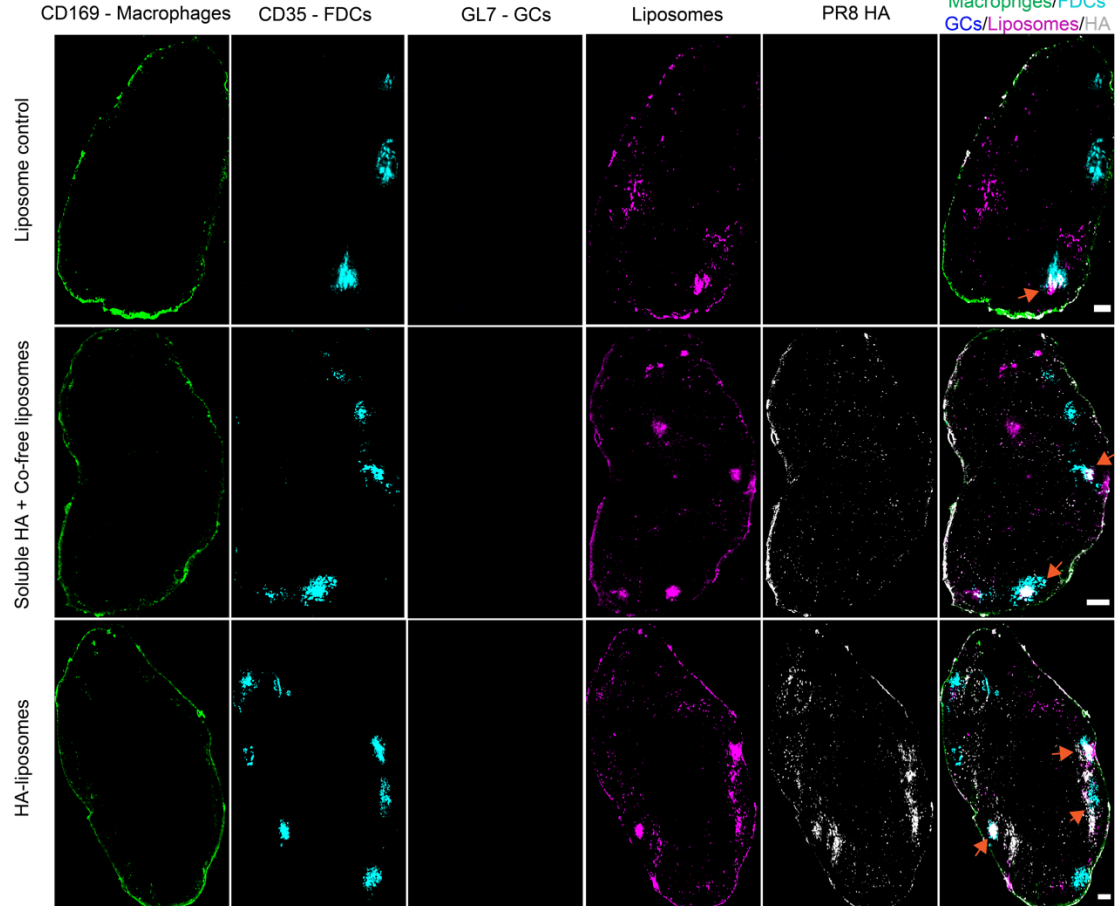

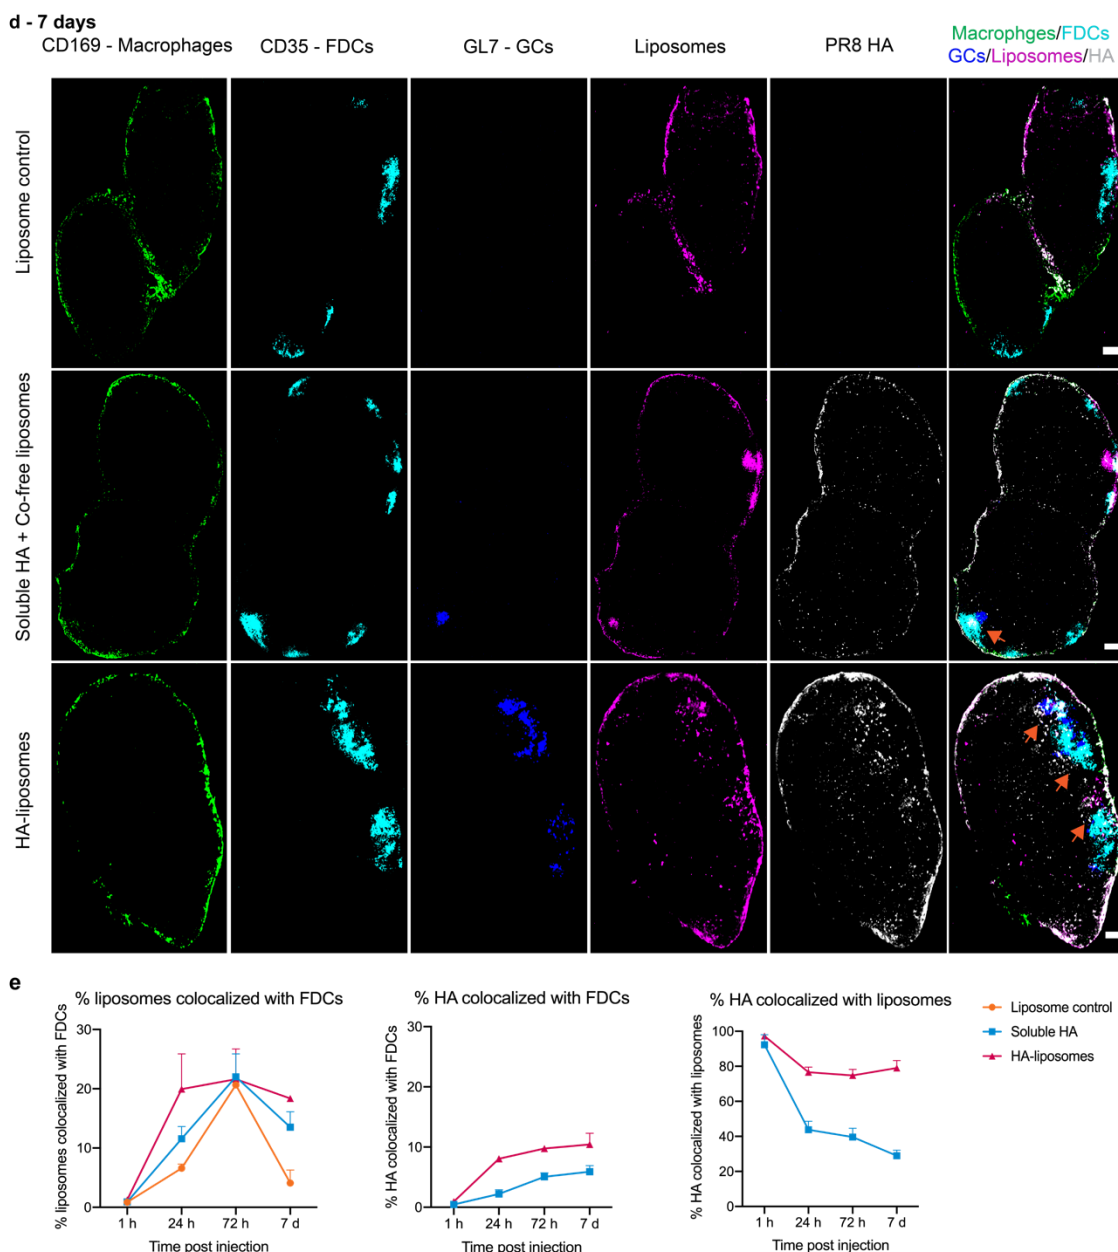

**Figure S6:** Confocal images of lymph nodes of mice at 1 h (a), 24 h (b), 72 h (c), and 7 days (d) post vaccination with plain liposome control, soluble HA mixed with cobalt-free liposomes, and HA-liposomes. HA proteins were labelled with AF647 (gray) while 16:0 Liss Rhod PE (magenta) were stained for liposomes. Cells were labelled with CD169 BV605 (macrophages – green), CD35 BV421 (FDCs – cyan), and GL7 AF488 (GCs – blue). Scale bars = 150  $\mu$ m. e, Percentage of percentage of liposomes colocalized with FDCs (left), HA colocalized with FDCs (middle), and HA colocalized with liposomes (right) analyzed using colocalization tool in FIJI.

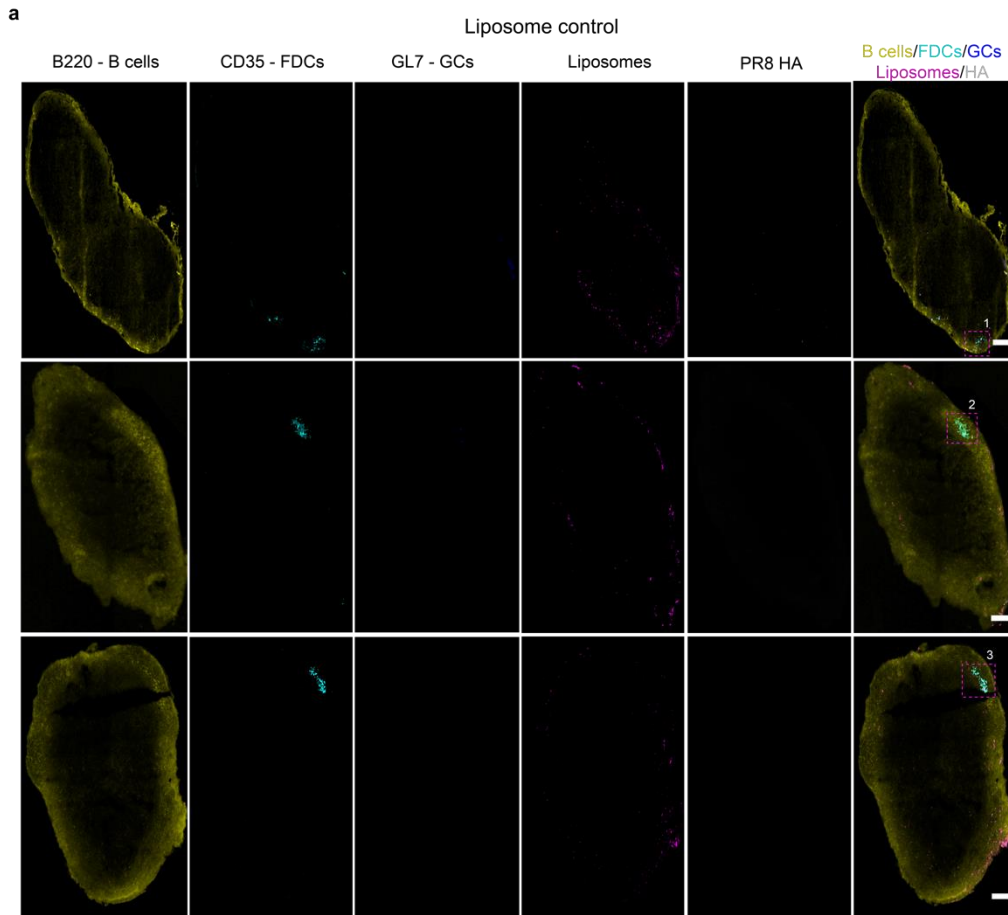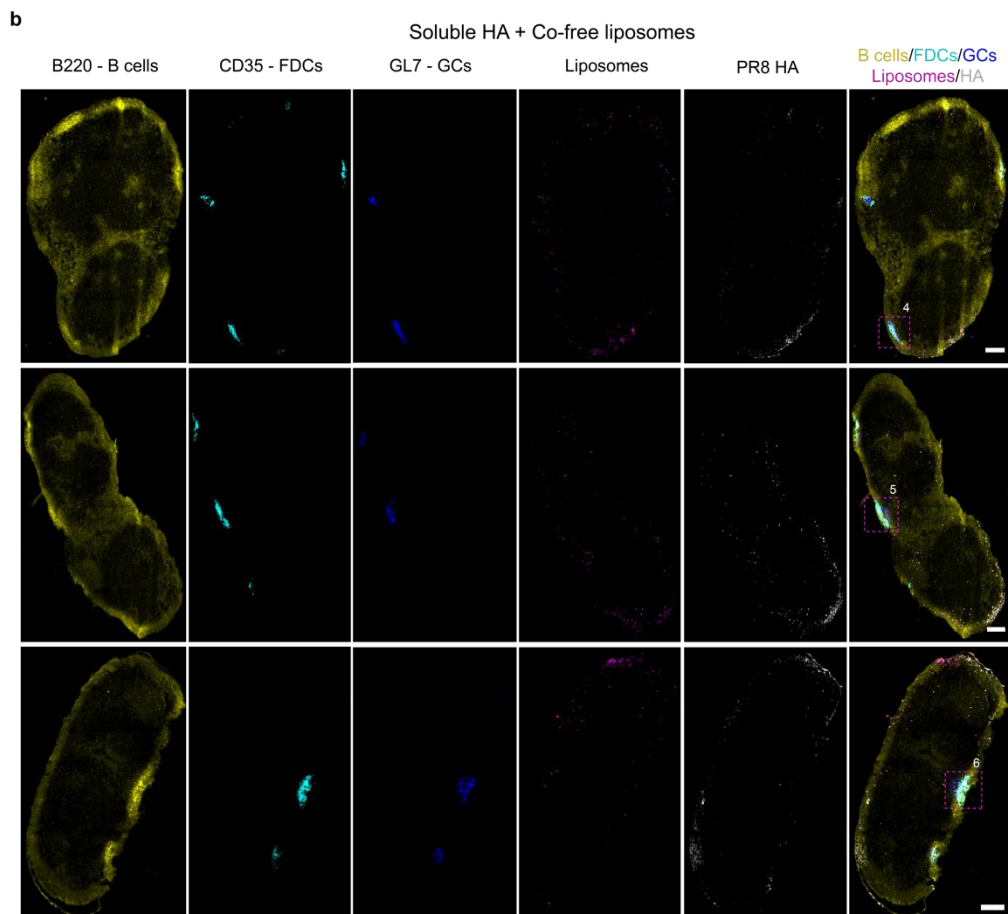

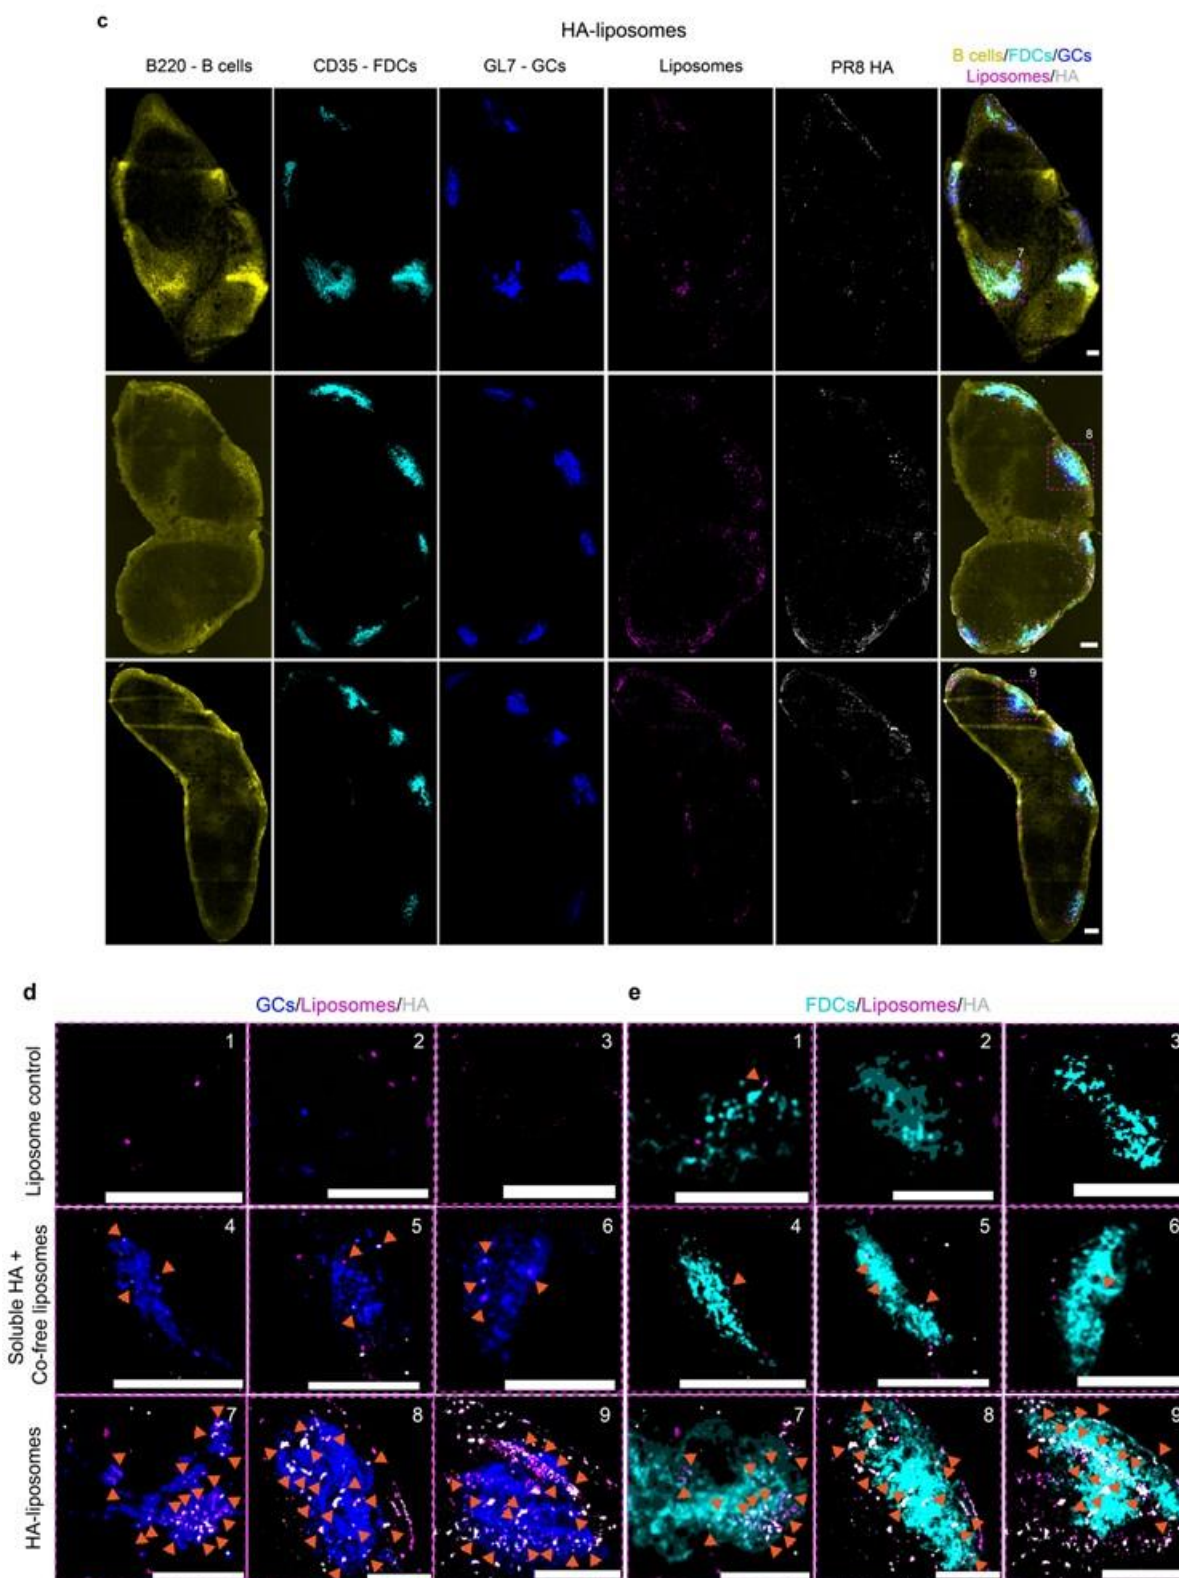

**Figure S7:** Confocal images of lymph nodes of mice at day 14 post vaccination with plain liposome control (a), soluble HA mixed with cobalt-free liposomes (b), and HA-liposomes (c). HA proteins were labelled with AF647 (gray) while 16:0 Liss Rhod PE (magenta) were stained for liposomes. Cells were labelled with B220 BV510 (B cells – yellow), CD35 BV421 (FDCs – cyan), and GL7 AF488 (GCs – blue). Inset images of follicle regions were magnified



to allow visualization of HA and liposomes colocalized with either GC (d) or FDC (e) areas. Scale bars = 150  $\mu$ m.

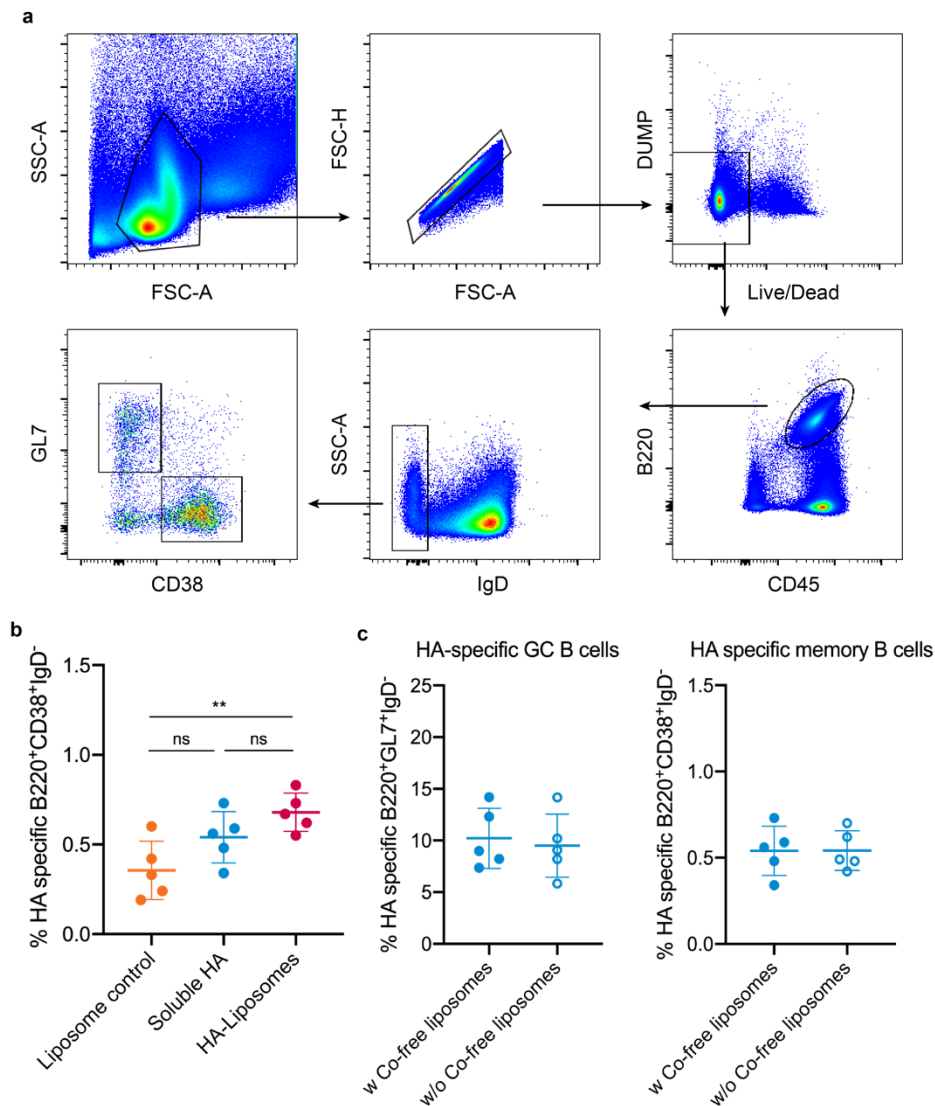

**Figure S8: B cell responses in lymph nodes of mice immunized with soluble HA and HA-liposomes.** **a**, Gating strategy to identify germinal central B cells (IgD<sup>-</sup>B220<sup>+</sup>GL7<sup>+</sup>CD38<sup>lo</sup>) and memory B cells (IgD<sup>-</sup>B220<sup>+</sup>GL7<sup>lo</sup>CD38<sup>+</sup>). **b**, Proportion of HA-specific memory B cells in total memory B cells. **c**, Frequencies of HA-specific GC B cells in total GC B cells (right) and HA-specific memory B cells in total memory B cells (left) in mice vaccinated with soluble HA with (w) or without (w/o) presence of Co-free liposomes. Data are presented as mean  $\pm$  SD and representative of one of two independent experiments. Each dot in plots represent one animal. One-way ANOVA with Tukey's pairwise comparisons post-hoc test was used to assess statistical significance between three group data; ns  $p > 0.05$ , \*\*  $p < 0.01$ .

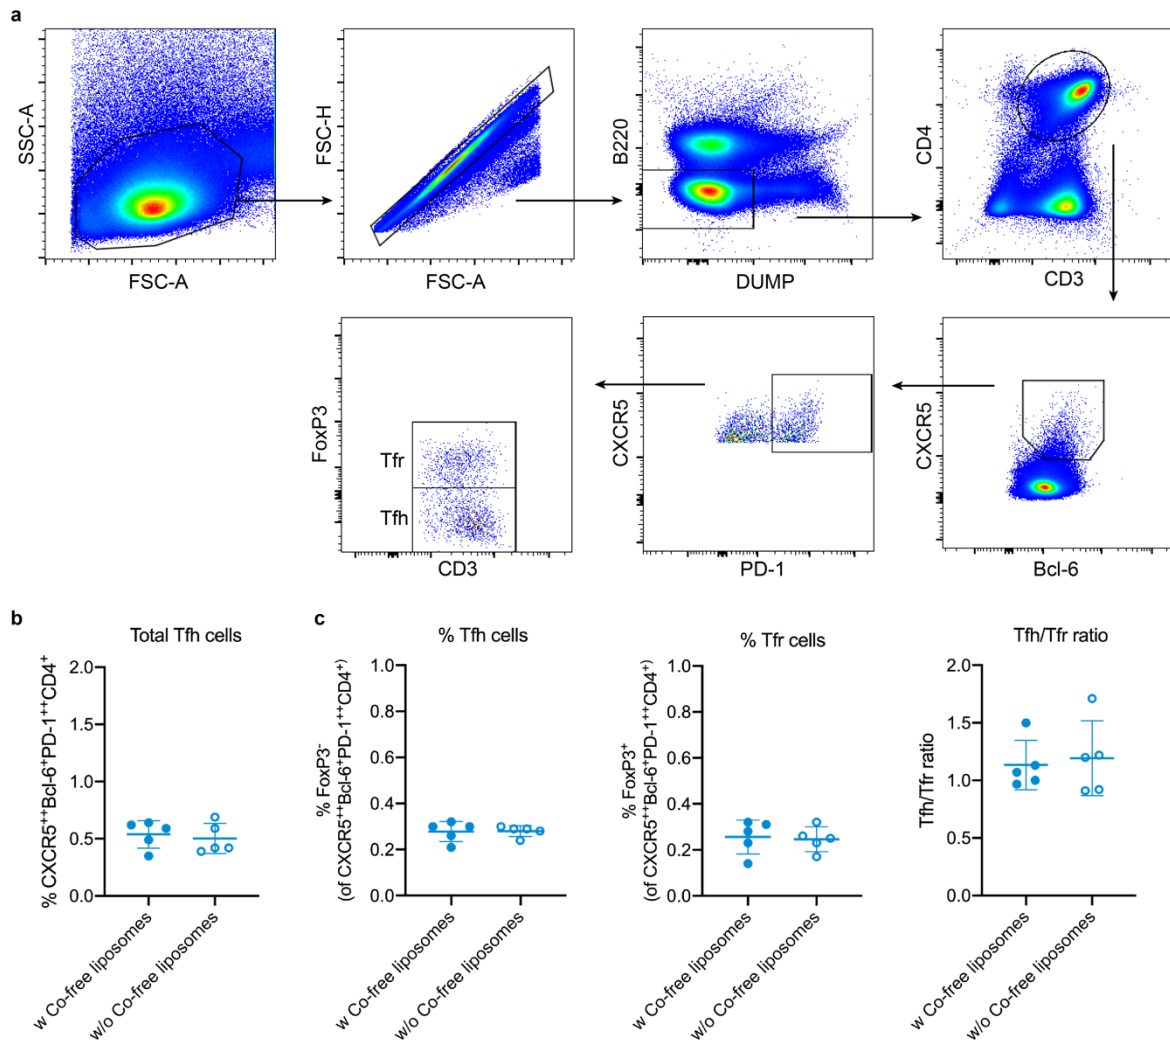

**Figure S9:** **a**, Gating strategy to identify follicular helper T (Tfh) cells ( $CD4^+CXCR5^{hi}Bcl-6^{hi}PD-1^{hi}Foxp3^-$ ) and follicular regulatory T (Tfr) cells ( $CD4^+CXCR5^{hi}Bcl-6^{hi}PD-1^{hi}Foxp3^+$ ). **b** and **c**, Frequencies of total Tfh cells (**b**), Foxp3<sup>-</sup> Tfh cells (**c**, left), Foxp3<sup>+</sup> Tfr cells (**c**, middle), and ratio Tfh to Tfr cells (**c**, right) in mice vaccinated with soluble HA with (w) and without (w/o) presence of Co-free liposomes.
